# Supplementary material for: Green and Highly-Efficient Microwave Synthesis Route for Sulfur/Carbon Composite for Li-S Battery
Source: MDPI journal article supplement (doi:10.3390/ijms23010039), 2021-12-21
Supplement: s1 [file s1]

## Supporting Information

### Green and high-efficient microwave synthesis route for sulfur/carbon composite for Li-S battery

*Chun-Han Hsu<sup>a\*</sup>, Cheng-Han Chung<sup>b</sup>, Tzu-Hsien Hsieh<sup>c</sup> and Hong-Ping Lin<sup>b\*</sup>*

a. National Tainan Junior College of Nursing, Tainan 700, Taiwan. b. Department of chemistry, National Cheng Kung University, Tainan 70101, Taiwan. c. Green Technology Research Institute, CPC Corporation, Kaohsiung 81126, Taiwan

\*Corresponding author: hplin@mail.ncku.edu.tw; chunhanhsu@gmail.com

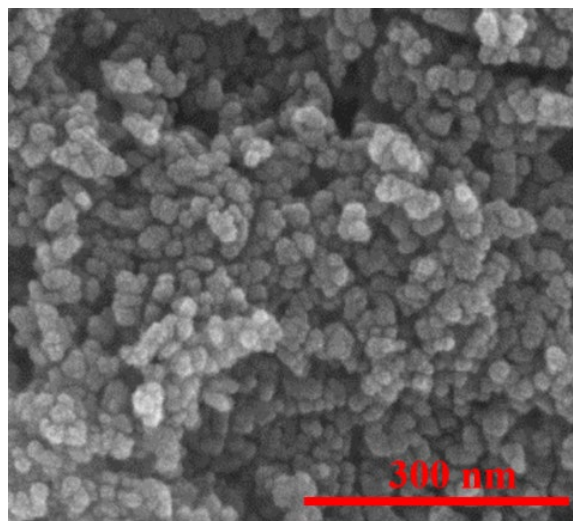

**Figure S1.** SEM image of ZnO nanoparticle.

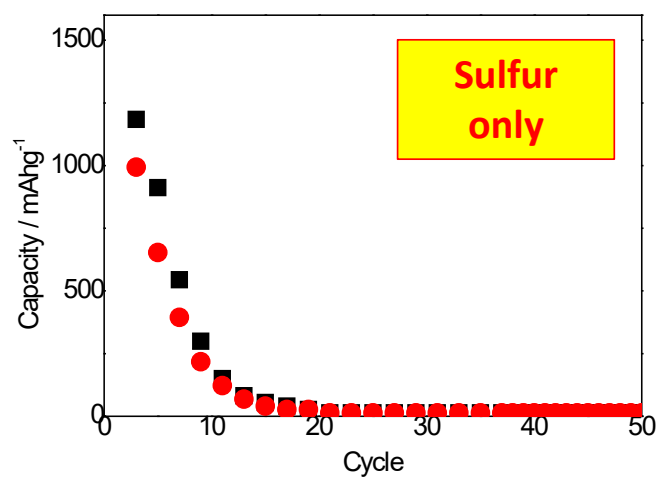

**Figure S2.** Cyclic performance of sulfur electrode.

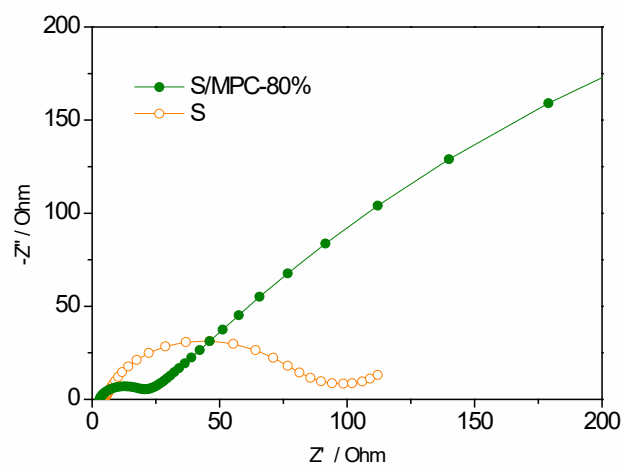

**Figure S3.** EIS spectra of cell made by S/MPC-80% and sulfur electrode.

**Table S1.** The weight data of S/MPC samples before and after microwave treatment.

| Condition           | MPC / g | Sulfur / g | Weight / g (after<br>Microwave treatment) | Sulfur contain/% |
|---------------------|---------|------------|-------------------------------------------|------------------|
| <i>Raw MPC</i>      | 1.0     | 0          | 1.0 ( <i>300 W* 60 s</i> )                | 0                |
| <i>100 W * 60 s</i> | 0.2     | 0.8        | 1.0                                       | 80%              |
| <i>200 W * 60 s</i> | 0.2     | 0.8        | 0.74                                      | 73%              |
| <i>300 W * 60 s</i> | 0.2     | 0.8        | 0.67                                      | 70%              |
